# Supplementary material
Source: publisher figshare collection journal article supplement (https://acs.figshare.com/ndownloader/files/4688347)
Supplement: Supplementary file 1 [file 4688347]

Supporting information for

**“In-Situ Loading of Noble Metal Nanoparticles on  
Hydroxyl-Group-Rich Titania Precursor and Their Catalytic  
Applications”**

Liang-Shu Zhong, Jin-Song Hu, Zhi-Min Cui, Li-Jun Wan\*, Wei-Guo Song\*

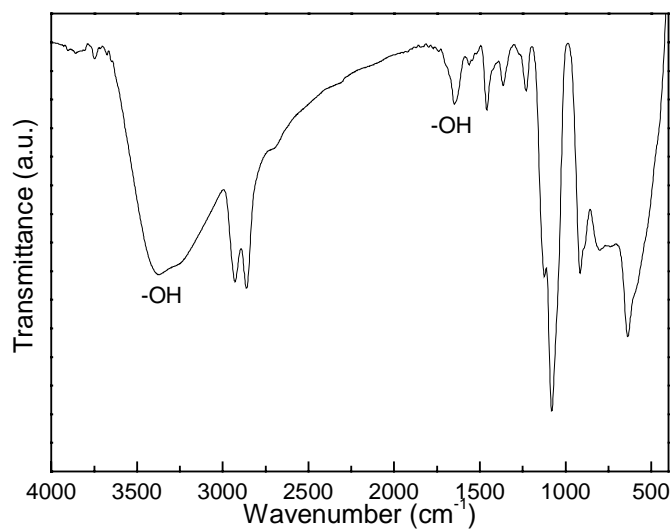

**Figure S1.** FTIR spectra taken from the TiO<sub>2</sub> precursor.

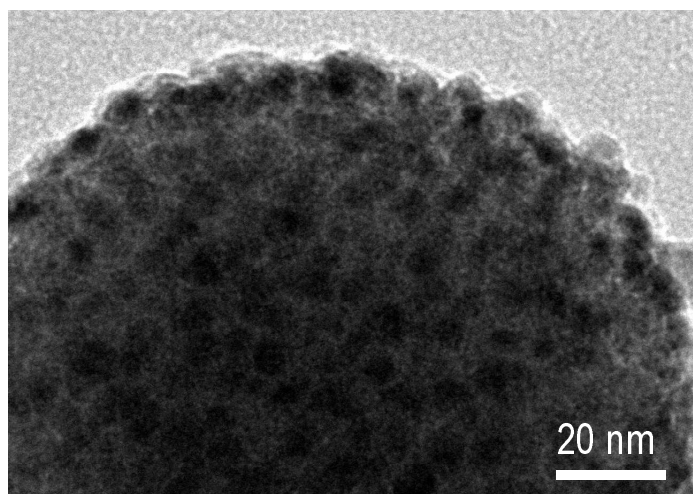

**Figure S2.** TEM image of TiO<sub>2</sub> precursor-Pd after 5 times catalysis recycling.
